# Supplementary material for: Photoinduced reversible gel–sol transitions of dicholesterol-linked azobenzene derivatives through breaking and reforming of van der Waals interactions
Source: Royal Society of Chemistry journal article supplement (doi:10.1039/c0sm00330a), 2010-11-08
Supplement: c0sm00330a.pdf [file c0sm00330a.pdf]

Electronic Supplementary Information (ESI) for

# Photoinduced Reversible Gel-Sol Transitions of Dicholesterol-linked Azobenzene Derivatives through Breaking and Reforming of van der Waals interactions

Yeping Wu, Si Wu, Xiujie Tian, Xin Wang, Wenxuan Wu, Gang Zou and Qijin Zhang\*

*CAS Key Laboratory of Soft Matter Chemistry, Department of Polymer Science and Engineering, University of Science and Technology of China, Key Laboratory of Optoelectronic Science and Technology in Anhui Province, Hefei, Anhui 230026 P.R. China. Fax: +86 551 3601704; E-mail: zqjm@ustc.edu.cn*

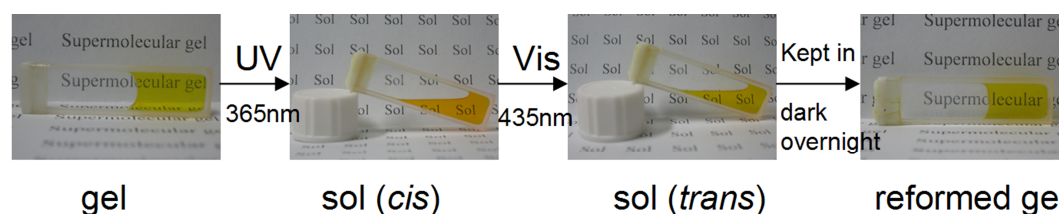

Fig. S1 Pictures of the gel-sol-gel transitions of the cyclopentanone gel of **DCAZO2**, showing the reversibility of the gel.

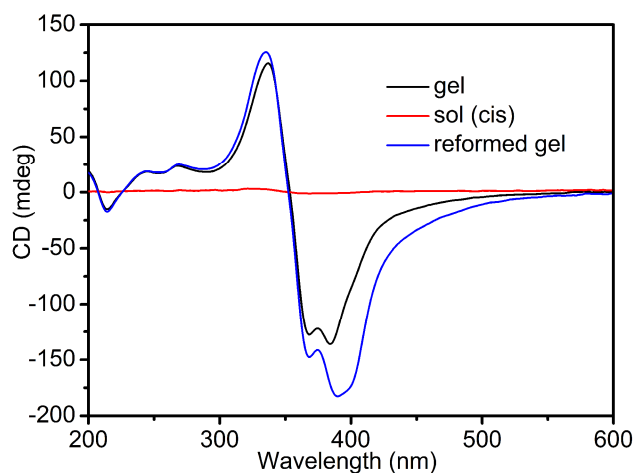

Fig. S2 CD spectra of the cyclopentanone gel of **DCAZO2** (1% w/v, 0.13 mm path length) (black line), sol obtained after UV light (365 nm) irradiation (red line) and reformed gel obtained after visible light (435 nm) irradiation and kept in dark overnight (blue line).
